# Supplementary material for: Functions of Liver Natural Killer Cells Are Dependent on the Severity of Liver Inflammation and Fibrosis in Chronic Hepatitis C
Source: PubMed Central journal article supplement (PMC3997478; doi:10.1371/journal.pone.0095614), 2014-04-23

## Supplementary Figure 2

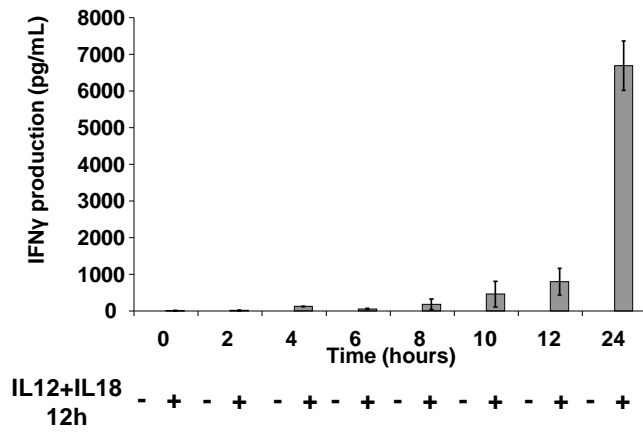

Supplement: pone.0095614.s002.pdf [file pone.0095614.s002.pdf]
