# Supplementary material for: Functions of Liver Natural Killer Cells Are Dependent on the Severity of Liver Inflammation and Fibrosis in Chronic Hepatitis C
Source: PubMed Central journal article supplement (PMC3997478; doi:10.1371/journal.pone.0095614), 2014-04-23
Supplement: pone.0095614.s005.pdf [file pone.0095614.s005.pdf]

**Supplementary Table 1.**

|                                | HCV-infected patients (Group 1) |            |              |            | NASH individuals (Group 2) |            |              |             |
|--------------------------------|---------------------------------|------------|--------------|------------|----------------------------|------------|--------------|-------------|
|                                | IFN- $\gamma$ Study             |            | CD107a Study |            | IFN- $\gamma$ Study        |            | CD107a Study |             |
|                                | N=37                            |            | N=64         |            | N=8                        |            | N=11         |             |
| Male, n (%)                    | 18                              | 49%        | 37           | 58%        | 2                          | 25%        | 8            | 72%         |
| Age (y)*                       | 55.2                            | $\pm$ 6.7  | 52.6         | $\pm$ 9.5  | 65.9                       | $\pm$ 9.5  | 57.3         | $\pm$ 12.6  |
| Plasma Viral load (log IU/mL)* | 6.1                             | $\pm$ 0.8  | 5.9          | $\pm$ 0.9  | -                          | -          | -            | -           |
| Serum ALT (IU/mL)*             | 84.9                            | $\pm$ 34.6 | 100.1        | $\pm$ 91.8 | 55.0                       | $\pm$ 49.5 | 81.0         | $\pm$ 117.6 |
| Genotype Viral 1               | 27                              | 73%        | 48           | 75%        | NA                         |            | NA           |             |
| Metavir Activity Score, n (%)  |                                 |            |              |            |                            |            |              |             |
| A0                             | 0                               | -          | 0            | -          | 3                          | 37%        | 6            | 55%         |
| A1                             | 23                              | 62%        | 34           | 53%        | 3                          | 37%        | 4            | 36%         |
| A2/3                           | 14                              | 38%        | 30           | 47%        | 2                          | 25%        | 1            | 9%          |
| Metavir Fibrosis score, n (%)  |                                 |            |              |            |                            |            |              |             |
| F0/1                           | 18                              | 49%        | 30           | 47%        | 7                          | 88%        | 6            | 55%         |
| F2                             | 15                              | 40%        | 22           | 34%        | 0                          | -          | 1            | 9%          |
| F3/4                           | 4                               | 11%        | 12           | 19%        | 1                          | 12%        | 4            | 36%         |

\*average  $\pm$  standard deviation
